# Supplementary material for: Implementing DASH-Aligned Meals and Self-Measured Blood Pressure to Reduce Hypertension at Senior Centers: A RE-AIM Analysis
Source: MDPI journal article supplement (doi:10.3390/nu14224890), 2022-11-18
Supplement: s1 [file s1]

**Table S1.** Mission/Services of Advisory Committee Members.

| <b>Services/Populations Best Aligned with Organizational Mission (select all that apply)</b> | <b>% (n)</b> |
|----------------------------------------------------------------------------------------------|--------------|
| <b>Seniors (older adults)</b>                                                                | 52.0% (13)   |
| <b>Food Security/Scarcity</b>                                                                | 28% (7)      |
| <b>Nutrition</b>                                                                             | 36% (9)      |
| <b>Health Services (hospital, healthcare system, vendor)</b>                                 | 28% (7)      |
| <b>Wellness</b>                                                                              | 24% (6)      |
| <b>Health Research</b>                                                                       | 56% (14)     |
| <b>Health Policy</b>                                                                         | 16% (4)      |
| <b>Populations Affected by Health Disparities</b>                                            | 20% (5)      |
